# Supplementary material for: Regulation of cytokine signaling through direct interaction between cytokine receptors and the ATG16L1 WD40 domain
Source: PubMed Central journal article supplement (PMC7679444; doi:10.1038/s41467-020-19670-4), 2020-11-20
Supplement: 41467_2020_19670_MOESM3_ESM.pdf [file 41467_2020_19670_MOESM3_ESM.pdf]

## **Descriptions of Additional Supplementary Files**

### **Supplementary Data 1**

**Description:** Complete list of Type-I transmembrane proteins including the WDD-binding motif in their intracellular domains. Motif identities for all molecules are shown in Supplementary Data 2.

### **Supplementary Data 2**

**Description:** Motifs identified in the intracellular domains of Type-I transmembrane proteins shown in Supplementary Data 1.

### **Supplementary Data 3**

**Description:** Complete list of cytokine receptors including the WDDbinding motif in their intracellular domains. Motif identities for each molecules are shown in Supplementary Data 4.

### **Supplementary Data 4**

**Description:** Motifs identified in the intracellular domains of cytokine receptors shown in Supplementary Data 3.

### **Supplementary Data 5**

**Description:** List of all human Type-I transmembrane proteins downloaded from the Uniprot server.
